# Supplementary material for: Predicting the Grade of Prostate Cancer Based on a Biparametric MRI Radiomics Signature
Source: Hindawi journal article supplement (doi:10.1155/2021/7830909), 2021-12-23
Supplement: f1 [file 7830909.f1.zip]

Table 1 PI-RADS V2.1 Assessment for T2WI

| Score | Peripheral Zone (PZ)                                                                                                                                                   |
|-------|------------------------------------------------------------------------------------------------------------------------------------------------------------------------|
| 1     | Uniform hyperintense signal intensity(normal)                                                                                                                          |
| 2     | Linear or wedge-shaped hypointensity or diffuse mild hypointensity, usually indistinct margin                                                                          |
| 3     | Heterogeneous signal intensity or non-circumscribed, rounded, moderate hypointensity<br>Includes others that do not qualify as 2, 4, or 5                              |
| 4     | Circumscribed, homogenous moderate hypointense focus/mass confined to prostate and <1.5 cm in greatest dimension                                                       |
| 5     | Same as 4 but $\geq 1.5$ cm in greatest dimension or definite extraprostatic extension/invasive behavior                                                               |
| Score | Transition Zone (TZ)                                                                                                                                                   |
| 1     | Normal appearing TZ (rare) or a round, completely encapsulated nodule. ("typical nodule")                                                                              |
| 2     | A mostly encapsulated nodule OR a homogeneous circumscribed nodule without encapsulation. ("atypical nodule") OR a homogeneous mildly hypointense area between nodules |
| 3     | Heterogeneous signal intensity with obscured margins<br>Includes others that do not qualify as 2, 4, or 5                                                              |
| 4     | Lenticular or non-circumscribed, homogeneous, moderately hypointense, and <1.5 cm in greatest dimension                                                                |
| 5     | Same as 4, but $\geq 1.5$ cm in greatest dimension or definite extraprostatic extension/invasive behavior                                                              |

Table 2 PI-RADS V2.1 Assessment of DWI

| Score | Peripheral Zone (PZ) or Transition Zone (TZ)                                                                                                                                                                           |
|-------|------------------------------------------------------------------------------------------------------------------------------------------------------------------------------------------------------------------------|
| 1     | No abnormality (i.e., normal) on ADC and high b-value DWI                                                                                                                                                              |
| 2     | Linear/wedge shaped hypointense on ADC and/or linear/wedge shaped hyperintense on high b-value DWI                                                                                                                     |
| 3     | Focal (discrete and different from the background) hypointense on ADC and/or focal hyperintense on high b-value DWI;<br>may be markedly hypointense on ADC or markedly hyperintense on high b-value DWI, but not both. |
| 4     | Focal markedly hypointense on ADC and markedly hyperintense on high b-value DWI;<br><1.5cm in greatest dimension                                                                                                       |
| 5     | Same as 4 but $\geq 1.5$ cm in greatest dimension or definite extraprostatic extension/invasive behavior                                                                                                               |

Table 3 PI-RADS V2.1 Assessment for DCE

| Score | Peripheral Zone (PZ) or Transition Zone (TZ)                                                                                                                                                                                                                          |
|-------|-----------------------------------------------------------------------------------------------------------------------------------------------------------------------------------------------------------------------------------------------------------------------|
| (-)   | no early or contemporaneous enhancement; or diffuse multifocal enhancement NOT corresponding to a focal finding on T2W and/or DWI or focal enhancement corresponding to a lesion demonstrating features of BPH on T2WI (including features of extruded BPH in the PZ) |
| (+)   | focal, and; earlier than or contemporaneously with enhancement of adjacent normal prostatic tissues, and; corresponds to suspicious finding on T2W and/or DWI                                                                                                         |

Table 4 PI-RADS V2.1 Assessment for Peripheral Zone (PZ)

| DWI | T2W | DCE | PIRADS |
|-----|-----|-----|--------|
| 1   | Any | Any | 1      |
| 2   | Any | Any | 2      |
| 3   | Any | -   | 3      |
|     |     | +   | 4      |
| 4   | Any | Any | 4      |
| 5   | Any | Any | 5      |

Table 5 PI-RADS Assessment for Transition Zone (TZ)

| T2WI | DWI      | DCE | PIRADS |
|------|----------|-----|--------|
| 1    | Any      | Any | 1      |
| 2    | $\leq 3$ | Any | 2      |
|      | $\geq 4$ | Any | 3      |
| 3    | $\leq 4$ | Any | 3      |
|      | 5        | Any | 4      |
| 4    | Any      | Any | 4      |
| 5    | Any      | Any | 5      |

Table 6 The scores for each case based on PI-RADS V2.1 scale of Radiologist A and B

| Patient | Radiologist A | Radiologist B |
|---------|---------------|---------------|
| 1       | 4             | 4             |
| 2       | 2             | 3             |
| 3       | 5             | 4             |
| 4       | 4             | 4             |
| 5       | 3             | 3             |
| 6       | 3             | 2             |
| 7       | 5             | 5             |
| 8       | 4             | 4             |
| 9       | 1             | 2             |
| 10      | 4             | 4             |
| 11      | 4             | 4             |

|    |   |   |
|----|---|---|
| 12 | 5 | 5 |
| 13 | 3 | 4 |
| 14 | 1 | 2 |
| 15 | 4 | 4 |
| 16 | 5 | 4 |
| 17 | 4 | 4 |
| 18 | 4 | 4 |
| 19 | 2 | 2 |
| 20 | 5 | 5 |
| 21 | 4 | 4 |
| 22 | 3 | 3 |
| 23 | 4 | 4 |
| 24 | 4 | 4 |
| 25 | 4 | 4 |
| 26 | 5 | 5 |
| 27 | 1 | 2 |
| 28 | 4 | 4 |
| 29 | 4 | 4 |
| 30 | 4 | 4 |
| 31 | 4 | 4 |
| 32 | 2 | 4 |
| 33 | 4 | 4 |
| 34 | 3 | 3 |
| 35 | 4 | 4 |
| 36 | 3 | 3 |
| 37 | 5 | 4 |
| 38 | 5 | 4 |
| 39 | 5 | 5 |
| 40 | 4 | 4 |
| 41 | 4 | 4 |
| 42 | 3 | 3 |
| 43 | 5 | 5 |
| 44 | 4 | 4 |
| 45 | 4 | 4 |
| 46 | 5 | 5 |
| 47 | 4 | 4 |
| 48 | 5 | 4 |
| 49 | 4 | 4 |
| 50 | 4 | 4 |
| 51 | 4 | 4 |
| 52 | 5 | 5 |
| 53 | 4 | 4 |

|    |   |   |
|----|---|---|
| 54 | 5 | 5 |
| 55 | 5 | 5 |
| 56 | 5 | 5 |
| 57 | 5 | 5 |
| 58 | 5 | 5 |
| 59 | 5 | 5 |
| 60 | 5 | 5 |
| 61 | 5 | 5 |
| 62 | 4 | 4 |
| 63 | 1 | 2 |
| 64 | 5 | 5 |
| 65 | 5 | 5 |
| 66 | 2 | 2 |
| 67 | 5 | 5 |
| 68 | 5 | 4 |
| 69 | 4 | 4 |
| 70 | 5 | 5 |
| 71 | 5 | 5 |
| 72 | 4 | 5 |
| 73 | 5 | 5 |
| 74 | 5 | 5 |
| 75 | 5 | 5 |
| 76 | 5 | 5 |
| 77 | 5 | 5 |
| 78 | 4 | 4 |
| 79 | 5 | 5 |
| 80 | 5 | 5 |
| 81 | 5 | 5 |
| 82 | 4 | 4 |
| 83 | 4 | 4 |
| 84 | 5 | 5 |
| 85 | 4 | 4 |
| 86 | 5 | 5 |
| 87 | 5 | 5 |
| 88 | 5 | 5 |
| 89 | 5 | 5 |
| 90 | 5 | 5 |
| 91 | 5 | 5 |
| 92 | 5 | 5 |
| 93 | 5 | 5 |
| 94 | 5 | 5 |
| 95 | 5 | 5 |

|     |   |   |
|-----|---|---|
| 96  | 4 | 4 |
| 97  | 5 | 5 |
| 98  | 5 | 5 |
| 99  | 5 | 5 |
| 100 | 5 | 5 |
| 101 | 5 | 5 |
| 102 | 5 | 5 |
| 103 | 5 | 5 |
| 104 | 5 | 5 |
| 105 | 5 | 5 |
| 106 | 5 | 5 |
| 107 | 5 | 5 |
| 108 | 5 | 5 |
| 109 | 5 | 5 |
| 110 | 5 | 5 |
| 111 | 4 | 4 |
| 112 | 5 | 5 |
| 113 | 4 | 4 |
| 114 | 4 | 4 |
| 115 | 5 | 5 |
| 116 | 5 | 5 |
| 117 | 5 | 5 |
| 118 | 4 | 4 |
| 119 | 5 | 5 |
| 120 | 4 | 4 |
| 121 | 3 | 4 |
| 122 | 5 | 5 |
| 123 | 5 | 5 |
| 124 | 5 | 5 |
| 125 | 5 | 5 |
| 126 | 5 | 5 |
| 127 | 4 | 5 |
| 128 | 5 | 5 |
| 129 | 5 | 5 |
| 130 | 5 | 5 |
| 131 | 4 | 4 |
| 132 | 5 | 5 |
| 133 | 5 | 5 |
| 134 | 4 | 5 |
| 135 | 5 | 5 |
| 136 | 5 | 5 |
| 137 | 4 | 4 |

|     |   |   |
|-----|---|---|
| 138 | 5 | 5 |
| 139 | 5 | 5 |
| 140 | 5 | 5 |
| 141 | 3 | 3 |
| 142 | 4 | 4 |

---
