# Supplementary material for: Predicting the Grade of Prostate Cancer Based on a Biparametric MRI Radiomics Signature
Source: Contrast Media Mol Imaging. 2021 Dec 23;2021:7830909. doi: 10.1155/2021/7830909 (PMC8718299; doi:10.1155/2021/7830909)
Supplement: Supplementary Materials — The supplementary file contains the supplementary information about the original data for radiomics (Supplementary Materials and Supplement Tables 1–6). [file 7830909.f1.zip]

Archive with 2 entries (2 files):
- 7830909.f1/Original data (1).pdf
- 7830909.f1/Supplementary Materials(tables).pdf
